# Supplementary material for: Hippo Signaling Influences HNF4A and FOXA2 Enhancer Switching during Hepatocyte Differentiation
Source: PubMed Central journal article supplement — Cell Rep. Author manuscript; Available in PMC 2015 Oct 20. (PMC4612615; doi:10.1016/j.celrep.2014.08.046), 2014-09-25
Supplement: NIHMS724768-supplement-Suppl_fig.pdf [file NIHMS724768-supplement-Suppl_fig.pdf]

# Supplemental Figures

## Figure S1

**A**

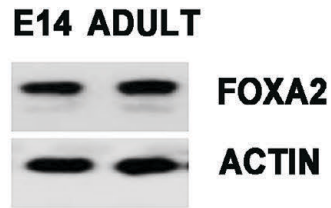

**B**

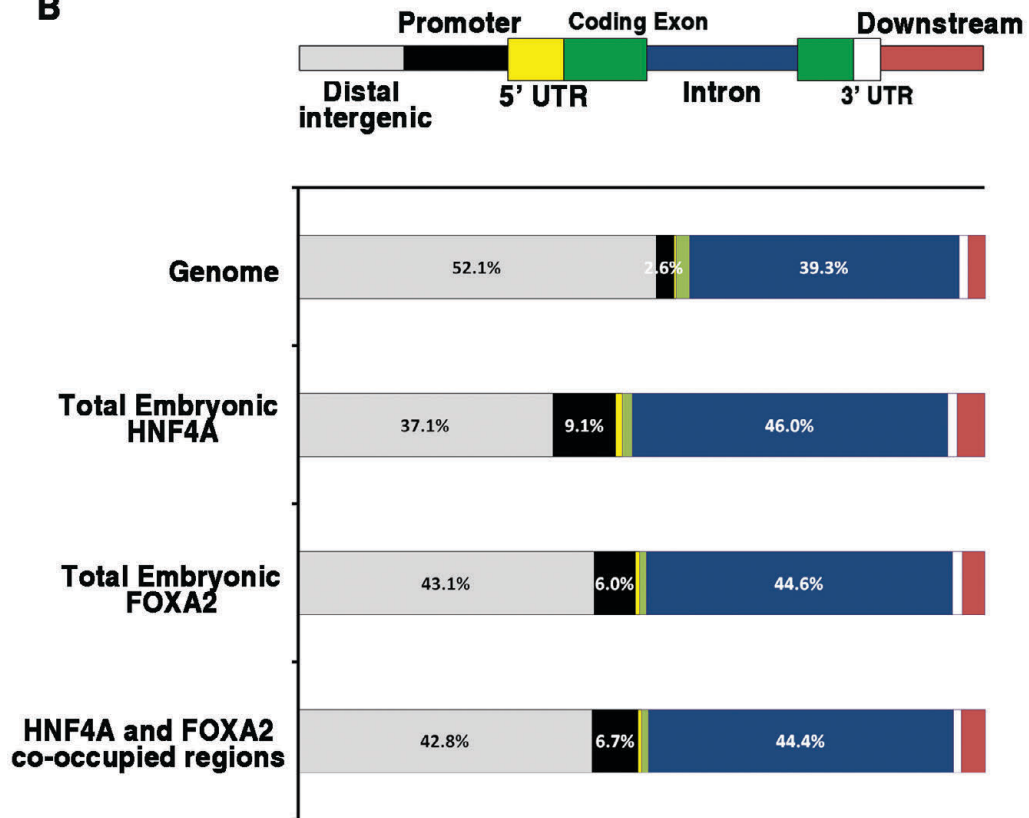

Figure S2

A

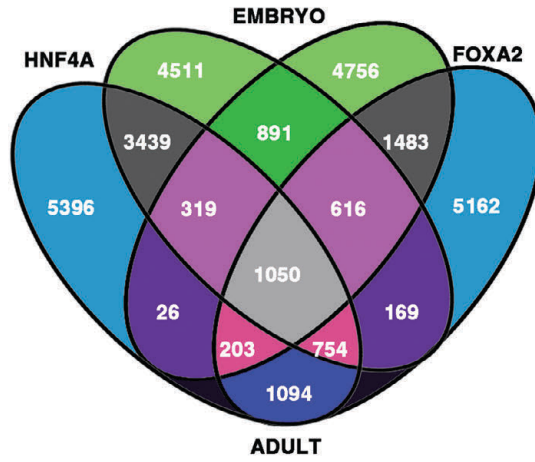

B

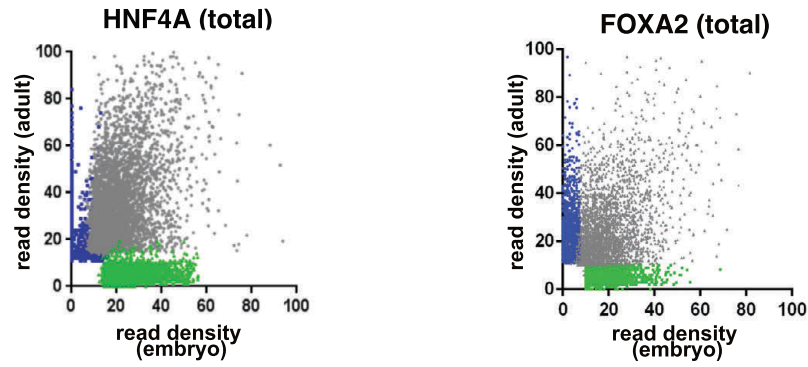

C

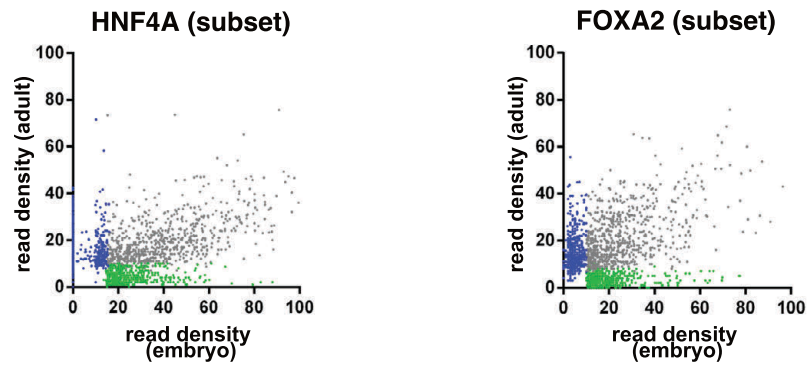

Figure S3

A

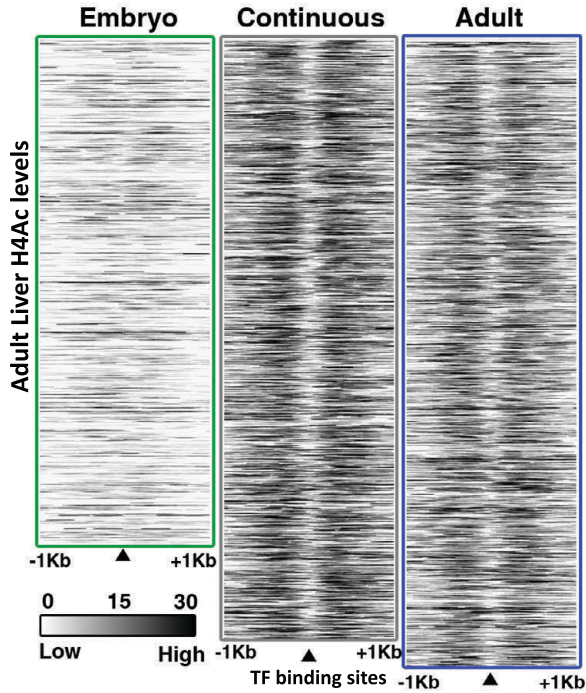

B

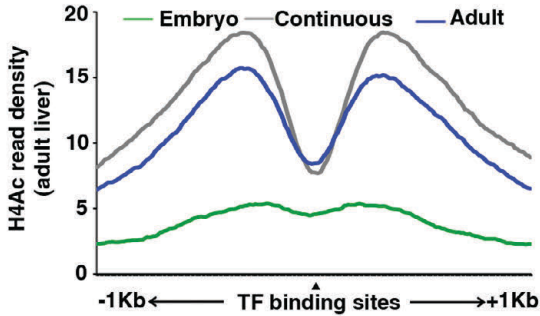

Figure S4

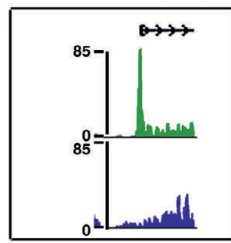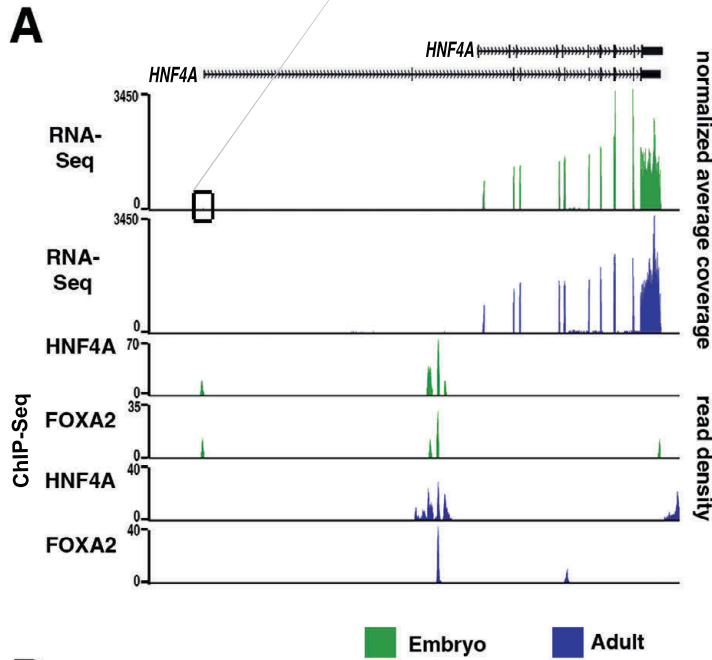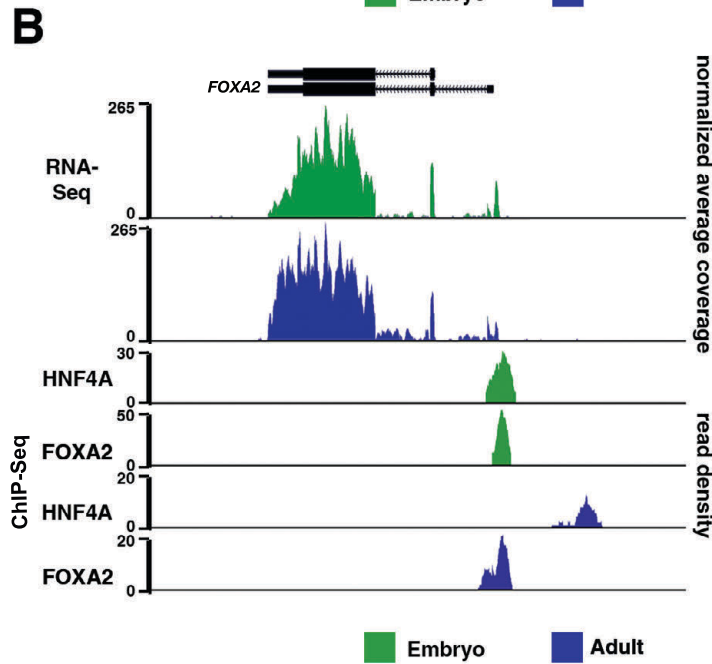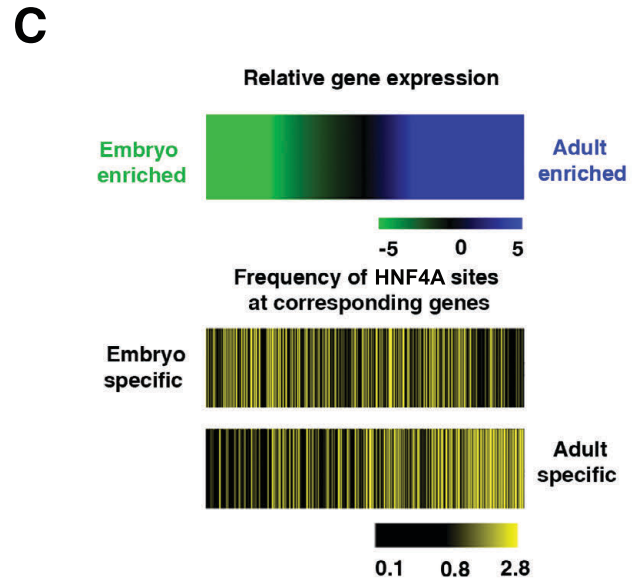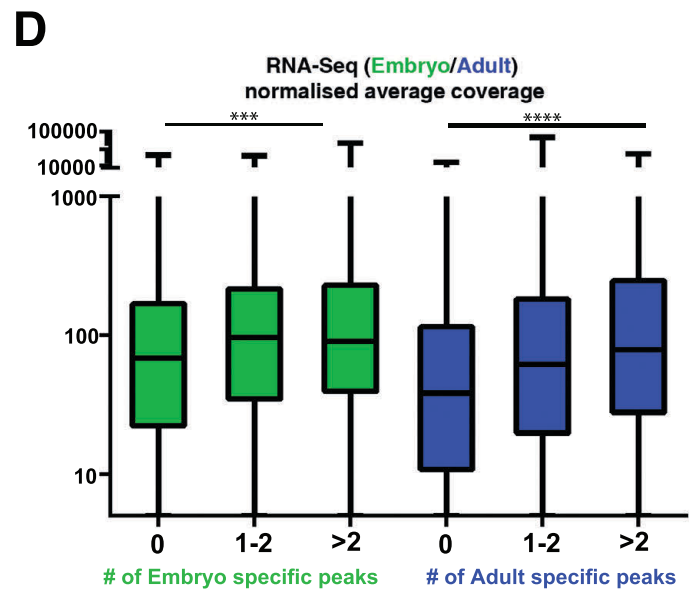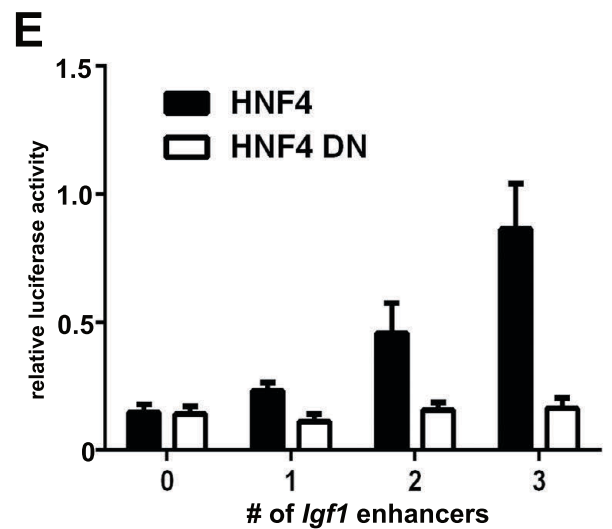

Figure S5

**A**

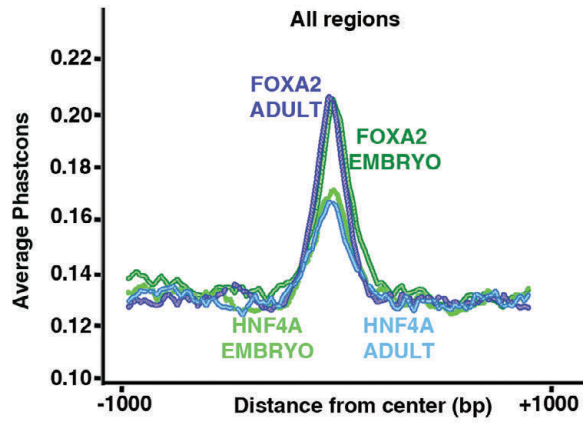

**B**

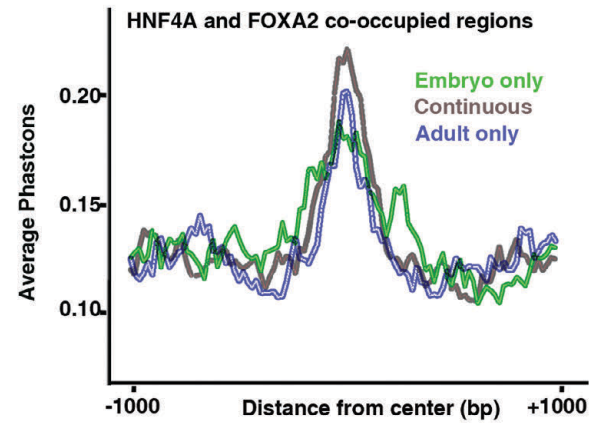

**C**

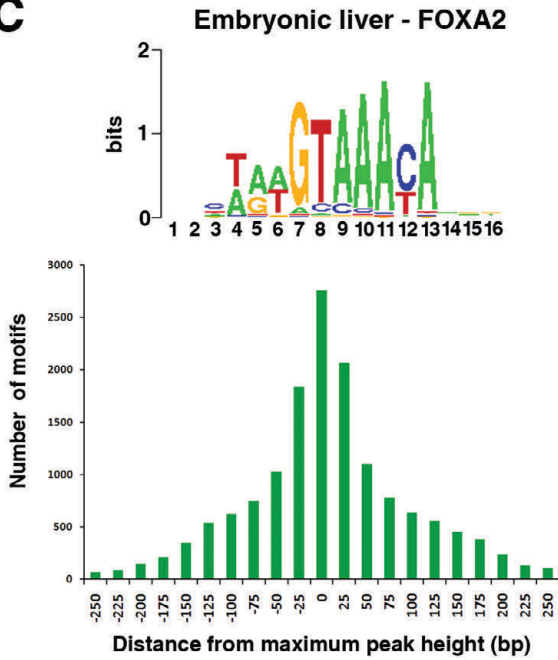

**D**

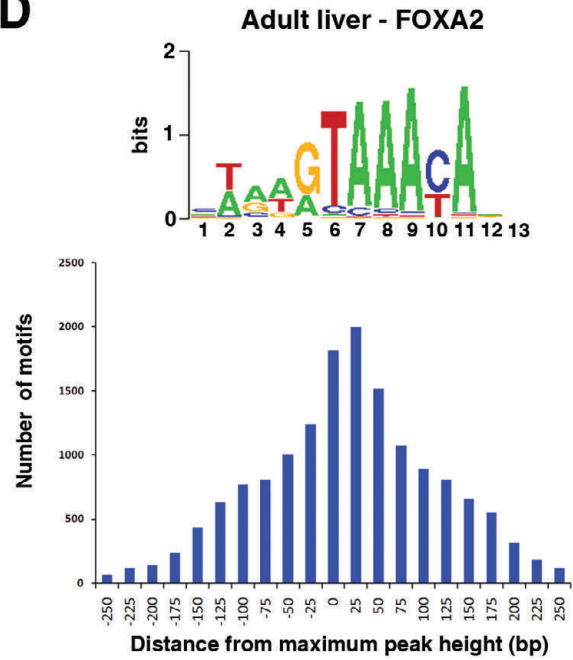

**E**

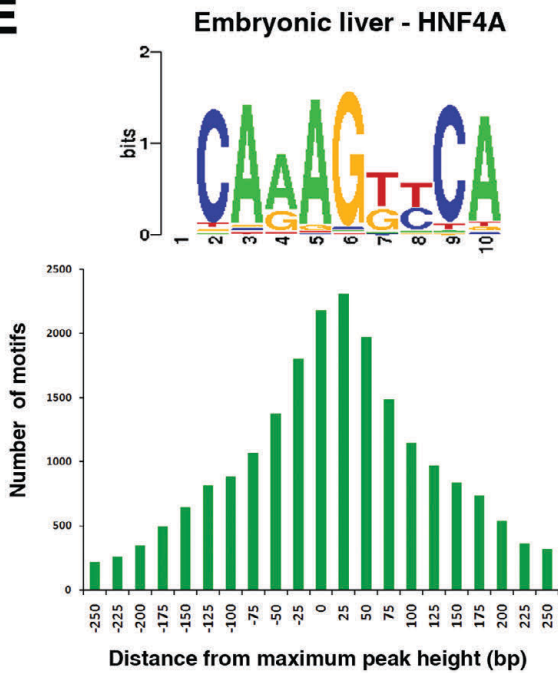

**F**

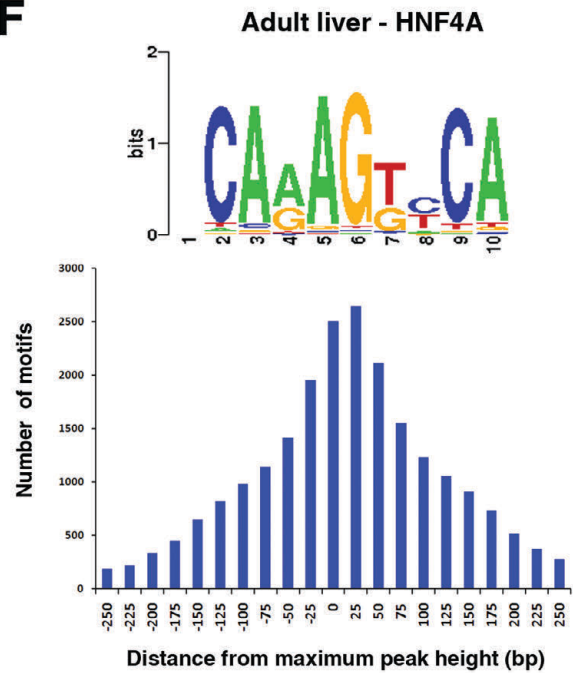

**Figure S6**

**A**

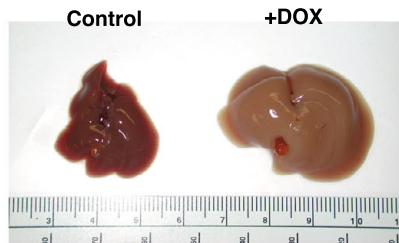

**B**

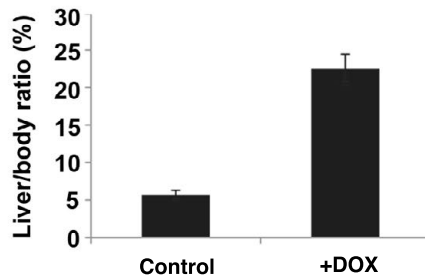

**C**

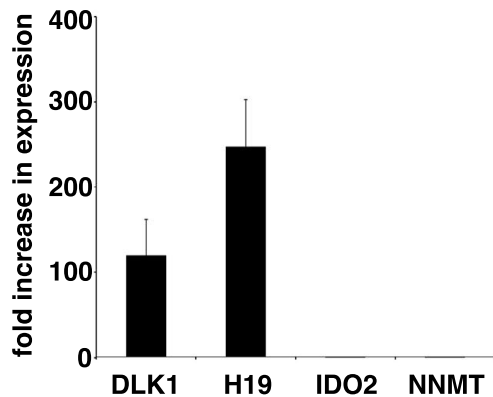

**D**

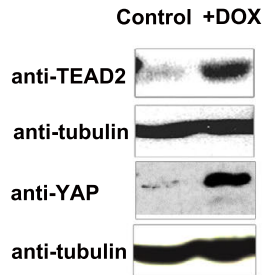

## Supplemental Figure Legends

**Figure S1. Genomic distribution of HNF4A and FOXA2 binding detected by ChIP-Seq in embryonic liver, see also Figure 1.** **A)** Western blot analysis of embryonic and adult liver protein extract using anti-FOXA2 **B)** Schematic representation of all HNF4A, FOXA2 or co-occupied sites of enrichment in embryonic liver compared to total genome annotation (mm9). Generated using default settings employed by Cis-regulatory Element Annotation System 1.0.2 (Shin *et al.*, 2009). Specifically; *promoter* regions are defined as 3000bp upstream of transcriptional start sites as defined by RefSeq, *downstream* regions refer to the 3000bp area immediately downstream regions of transcription termination sites of genes annotated in RefSeq, *3' and 5'UTRs*, *coding exons*, and *introns* are defined by RefSeq. If regions of enrichment do not fall into any of the above categories, they are considered to be *distal intergenic*.

**Figure S2. Global comparison and schematic representation of peak types in datasets, see also Figure 2.** **A)** Intersecting four ChIP-Seq datasets gives rise to 15 possible different peak types presented as a venn diagram illustrating the number of each type in our datasets. **B)** Global comparison of HNF4A and FOXA2 ChIP-Seq datasets was carried out using unthresholded bigwig files. The peak max for each enriched region in either embryonic (green), adult (blue) or both (grey) is represented on a scatterplot.

**Figure S3. Differentiation-dependent binding sites show distinct patterns of enhancer associated H4ac, see also Figure 3.** Heatmap representation of H4ac enrichment (high;black, low;grey) at regions bound by both FOXA2 and HNF4a (▲); only in embryonic liver (green;left), both embryonic and adult liver (grey;middle) or only in adult liver only (blue;right). Enrichment levels (low;white - high;blue) were profiled 1Kb in both directions at a resolution of 10bp from TF peak center, represented by small black triangle. The vertical ordering of sites is random. **B)** Average enrichment profiles of H4ac at differentiation-dependent FOXA2 and HNF4a binding sites (green line;embryo - grey line;continuous - blue line;adult).

**Figure S4. Expression analysis of embryonic hepatoblasts and adult hepatocytes, see also Figure 4.** RNA-Seq analysis revealed no significant difference in expression levels of HNF4A **(A)** and FOXA2 **(B)** between hepatoblasts purified from E14.5 liver and Adult liver. **A)** HNF4A and FOXA2 DNA binding were detected by ChIP-Seq (lower panels) at the alternative promoter for *HNF4A*. Only low levels of previously characterized 'embryonic' *HNF4A* isoform transcript were detected by RNA-Seq, highlighted in box. **C)** Transcript levels of genes targeted by HNF4A in differentiation-dependent manner either in hepatoblasts (embryo) or adult liver were measured using RNA-Seq. Relative target gene expression levels (log10) were used to rank and bin target genes (10 per unit). Order is conserved between heatmaps. Intensity in bottom two heatmaps (low:black,high:yellow) reflects the average number of differentiation-dependent DNA binding sites within 100kb of genes within that bin divided by the average number of sites per total number of genes in analysis. **D)** Genes were categorized according to the associated number of differentiation-dependent enhancers and global gene expression levels were compared between those not bound specifically at the developmental stage indicated, targeted at 1-2 putative enhancers or bound at more than 2 sites. Significance tested using Kruskal Wallis one way analysis of variance with Dunns post-test correction \*\*\*\*  $p < 0.001$  \*\*\* $p < 0.005$  **E)** *Igf1* enhancers were cloned into luciferase vectors containing a minimal promoter (E1B) and transfected into 293T cells alongside a Renilla containing construct.

Expression vectors for HNF4A and dominant negative (DN-HNF4A) were cotransfected. Luciferase assays were conducted 48 hours posttransfection. Data shown is from duplicate experiments and are represented as mean  $\pm$  SEM.

**Figure S5. Conservation of FOXA2 and HNF4A motifs underlying embryonic and adult enhancers, see also Figure 5.** **A)** Phastcons scores were calculated for both total ChIP-Seq datasets (**A**) and differentiation-dependent enhancers (**B**). Graphs were generated using the Conservation Plot Tool within the Galaxy/Cistrome toolbox. FOXA2 (**C**) and HNF4A (**D**) motifs (shown as position weight matrices) derived by *de novo* analysis on embryonic or adult specific peaks using SeqPos within the Galaxy/Cistrome toolbox. Below each motif is a histogram showing the distances of the motif center relative to the location of the maximal enrichment (maximum peak height).

**Figure S6. Induction of YAP-Tg by Doxycycline, see also Figure 6.** **A, B)** Liver size and body weight ratio is dramatically increased after two weeks of treatment, indicative of functional YAP1 expression. **C)** qRT-PCR analysis was conducted to determine expression levels of target genes. **D)** Nuclear protein was extracted from induced livers and subject to Western Blot analysis using anti-YAP1 and anti-TEAD2.



|                     | <b>Total Reads</b> | <b>Excl. Dup</b> | <b>% Mapped</b> | <b># Peaks (FDR 0.01)</b> | <b>Filtered Peaks</b> | <b>% Motifs</b> |
|---------------------|--------------------|------------------|-----------------|---------------------------|-----------------------|-----------------|
| <b>Embryo FOXA2</b> | 2.58E+07           | 1.3E+07          | 53.5            | 10,398                    | 9,338                 | 82.5            |
| <b>Embryo HNF4A</b> | 9.46E+07           | 1.5E+07          | 30.8            | 12,033                    | 11,699                | 83.5            |
| <b>Adult FOXA2</b>  | 3.3E+07            | 7.0E+06          | 33.0            | 10,964                    | 10,565                | 77.3            |
| <b>Adult HNF4A</b>  | 2.40E+07           | 1.2E+07          | 48.8            | 12,824                    | 12,270                | 91.6            |
| <b>Embryo Input</b> | 4.25E+07           | 1.0E+07          | 26.9            | 1,263                     | N/A                   | N/A             |
| <b>Adult input</b>  | 4.92E+07           | 2.2E+07          | 45.2            | 2,515                     | N/A                   | N/A             |

**Table S1. ChIP-Seq libraries - mapping and processing details, see also Figure 1.**

|                                           | Embryo      |         | Adult       |         |
|-------------------------------------------|-------------|---------|-------------|---------|
|                                           | Read count  | % Total | Read count  | % Total |
| Total read count                          | 314,882,346 | 100     | 198,186,798 | 100     |
| Read1-Read2 identical                     | 74,484      | 0.02    | 1,008       | 0.00    |
| Low complexity                            | 1,830,803   | 0.58    | 1,038,065   | 0.52    |
| Low quality (>1N)                         | 10,272,983  | 3.26    | 6,634,987   | 3.35    |
| Ensembl transcript                        | 128,156,991 | 43.88   | 118,760,931 | 59.92   |
| Ensembl transcript (ambiguous)            | 10,500,368  | 3.33    | 12,631,357  | 6.37    |
| Novel exon junction                       | 508,780     | 0.16    | 467,195     | 0.24    |
| Novel exon junction (ambiguous)           | 11,946      | 0.00    | 29,216      | 0.01    |
| Novel exon boundary extension             | 874,609     | 0.28    | 556,932     | 0.28    |
| Novel exon boundary extension (ambiguous) | 26,354      | 0.01    | 37,092      | 0.02    |
| Intron                                    | 13,381,115  | 4.25    | 7,601,203   | 3.84    |
| Intron (ambiguous)                        | 334,326     | 0.11    | 133,026     | 0.07    |
| Intergenic                                | 7,726,053   | 2.45    | 5,445,035   | 2.75    |
| Intergenic (ambiguous)                    | 128,248     | 0.04    | 76,145      | 0.04    |
| Repeat element                            | 21,438,097  | 6.81    | 1,664,223   | 0.84    |
| Repeat element (ambiguous)                | 363,865     | 0.12    | 165,864     | 0.08    |
| Unassigned                                | 109,253,310 | 34.70   | 42,944,505  | 21.67   |

**Table S2. RNA-Seq datasets - mapping and processing details, see also Figure 4.**
